# Supplementary material for: Characterization of electron donor sites on Al2O3 surface
Source: Royal Society of Chemistry journal article supplement (doi:10.1039/c2cp20863f), 2012-01-01
Supplement: c2cp20863f.pdf [file c2cp20863f.pdf]

**Table S1**

Coordinates of the optimized structure, Mulliken charges and spin densities for the model

shown in Figure 7A

| Atom<br>Number | Element | Coordinates, Å |           |           | Mulliken<br>charges | Spin<br>densities |
|----------------|---------|----------------|-----------|-----------|---------------------|-------------------|
|                |         | x              | y         | z         |                     |                   |
| 1              | Al      | 3.828655       | -0.000008 | 0         | 0.209384            | 0.012665          |
| 2              | O       | 4.591375       | 0.000967  | 1.527606  | -0.435184           | -0.00181          |
| 3              | H       | 5.532936       | -0.000206 | 1.710864  | 0.356951            | 0.000817          |
| 4              | O       | 4.591379       | -0.000942 | -1.527605 | -0.435183           | -0.00181          |
| 5              | H       | 5.532942       | -0.000139 | -1.710853 | 0.356951            | 0.000817          |
| 6              | C       | 0.136676       | -0.000004 | 0         | -0.010263           | -0.18939          |
| 7              | C       | -0.54969       | 1.228672  | -0.000062 | 0.083639            | 0.239159          |
| 8              | C       | -0.54971       | -1.228671 | 0.000064  | 0.083611            | 0.239161          |
| 9              | C       | -1.93634       | 1.18853   | -0.000062 | 0.081871            | -0.15352          |
| 10             | H       | -0.016         | 2.169722  | -0.000108 | 0.209695            | -0.00857          |
| 11             | C       | -1.93636       | -1.188514 | 0.000065  | 0.081891            | -0.15352          |
| 12             | H       | -0.01603       | -2.169727 | 0.000109  | 0.209694            | -0.00857          |
| 13             | C       | -2.66597       | 0.000014  | 0.000002  | -0.057372           | 0.251893          |
| 14             | H       | -3.7474        | 0.000024  | 0.000003  | 0.214004            | -0.00901          |
| 15             | N       | 1.516727       | -0.000013 | -0.000002 | -0.813274           | 0.439192          |
| 16             | O       | 2.251912       | 1.097606  | -0.000008 | 0.264329            | 0.172295          |
| 17             | O       | 2.2519         | -1.097636 | 0.000006  | 0.264323            | 0.172305          |
| 18             | N       | -2.67719       | 2.473121  | -0.000137 | -0.367579           | 0.012237          |
| 19             | O       | -3.90405       | 2.414514  | -0.000125 | 0.019168            | -0.00683          |
| 20             | O       | -2.01335       | 3.506919  | -0.000203 | 0.015882            | -0.00646          |
| 21             | N       | -2.67723       | -2.473098 | 0.000141  | -0.367592           | 0.012237          |
| 22             | O       | -3.90409       | -2.414488 | 0.000122  | 0.019171            | -0.00683          |
| 23             | O       | -2.01342       | -3.506914 | 0.000197  | 0.015884            | -0.00646          |

**Table S2**

Coordinates of the optimized structure, Mulliken charges and spin densities for the model  
shown in Figure 7B

| Atom<br>Number | Element | Coordinates, Å |          |          | Mulliken<br>charges | Spin<br>densities |
|----------------|---------|----------------|----------|----------|---------------------|-------------------|
|                |         | x              | y        | z        |                     |                   |
| 1              | Al      | -0.00612       | -0.03484 | -0.02236 | -0.07097            | 0.004268          |
| 2              | O       | -0.0344        | -0.05411 | 1.735699 | -0.46824            | 0.001464          |
| 3              | H       | 0.742409       | 0.332521 | 2.151685 | 0.326375            | 0.000038          |
| 4              | O       | -0.48964       | -1.48422 | -0.88693 | -0.52159            | 0.003925          |
| 5              | H       | -1.41895       | -1.71352 | -0.77585 | 0.338269            | -0.0007           |
| 6              | C       | -3.34259       | 2.251265 | -0.73906 | 0.208784            | -0.11069          |
| 7              | C       | -2.76251       | 3.481965 | -1.12155 | 0.23027             | 0.201131          |
| 8              | C       | -4.74722       | 2.117746 | -0.66333 | -0.43705            | 0.196464          |
| 9              | C       | -3.6085        | 4.541691 | -1.41556 | 0.051171            | -0.15313          |
| 10             | H       | -1.68808       | 3.583233 | -1.17808 | 0.206707            | -0.00718          |
| 11             | C       | -5.53086       | 3.219226 | -0.97197 | 0.345746            | -0.15214          |
| 12             | H       | -5.18615       | 1.174885 | -0.36925 | 0.199594            | -0.00786          |
| 13             | C       | -5.00464       | 4.458363 | -1.3548  | -0.09554            | 0.364334          |
| 14             | H       | -5.63769       | 5.299992 | -1.58925 | 0.189392            | -0.01334          |
| 15             | N       | -2.54341       | 1.156993 | -0.43553 | -0.97176            | 0.27002           |
| 16             | O       | -1.23706       | 1.33662  | -0.53365 | 0.455354            | 0.108504          |
| 17             | O       | -3.04651       | 0.04861  | -0.0965  | 0.025154            | 0.286253          |
| 18             | N       | -3.00758       | 5.828052 | -1.81569 | -0.41385            | 0.015407          |
| 19             | O       | -3.77381       | 6.762466 | -2.06962 | -0.01061            | -0.01427          |
| 20             | O       | -1.77985       | 5.905089 | -1.87672 | 0.003998            | 0.004196          |
| 21             | N       | -6.99689       | 3.079602 | -0.89386 | -0.41433            | 0.015325          |
| 22             | O       | -7.68171       | 4.069167 | -1.1683  | -0.01052            | -0.01376          |
| 23             | O       | -7.4627        | 1.988063 | -0.56118 | -0.00095            | 0.002634          |
| 24             | O       | 1.526135       | 0.608189 | -0.60443 | -0.4939             | -0.00092          |
| 25             | H       | 1.784377       | 0.3479   | -1.4936  | 0.328491            | 0.000032          |

**Table S3**

Coordinates of the optimized structure, Mulliken charges and spin densities for the model  
shown in Figure 8

| Atom<br>Number | Element | Coordinates, Å |          |          | Mulliken<br>charges | Spin<br>densities |
|----------------|---------|----------------|----------|----------|---------------------|-------------------|
|                |         | x              | y        | z        |                     |                   |
| 1              | Al      | -3.25275       | -1.30146 | 0.338327 | -0.07557            | 0.008453          |
| 2              | O       | -3.80246       | -2.74363 | -0.41958 | -0.37969            | -0.00051          |
| 3              | H       | -4.4339        | -2.76582 | -1.14229 | 0.350313            | 0.000043          |
| 4              | O       | -2.62163       | -1.39033 | 1.948675 | -0.46952            | 0.008274          |
| 5              | H       | -2.57543       | -2.21607 | 2.437913 | 0.360729            | -0.00027          |
| 6              | C       | 0.533245       | 0.107197 | -0.232   | -0.12434            | -0.18295          |
| 7              | C       | 1.289036       | 1.279103 | -0.05972 | 0.420071            | 0.226629          |
| 8              | C       | 1.143974       | -1.15863 | -0.27618 | 0.306652            | 0.207295          |
| 9              | C       | 2.665312       | 1.146196 | 0.068654 | -0.30088            | -0.13477          |
| 10             | H       | 0.822458       | 2.253568 | -0.02764 | 0.20951             | -0.00765          |
| 11             | C       | 2.52398        | -1.21396 | -0.14297 | -0.28341            | -0.13293          |
| 12             | H       | 0.558668       | -2.05866 | -0.40743 | 0.214814            | -0.00766          |
| 13             | C       | 3.319617       | -0.08305 | 0.032312 | 0.286703            | 0.217965          |
| 14             | H       | 4.393818       | -0.15674 | 0.134283 | 0.214853            | -0.00775          |
| 15             | N       | -0.85486       | 0.183009 | -0.35472 | -0.98638            | 0.454043          |
| 16             | O       | -1.40563       | 1.407281 | -0.33222 | 0.349405            | 0.107555          |
| 17             | O       | -1.55597       | -0.86262 | -0.62681 | 0.323016            | 0.236604          |
| 18             | N       | 3.475991       | 2.374248 | 0.250174 | -0.31492            | 0.010712          |
| 19             | O       | 4.690972       | 2.234366 | 0.362556 | 0.011342            | -0.00548          |
| 20             | O       | 2.877156       | 3.446933 | 0.275251 | -0.00258            | -0.00612          |
| 21             | N       | 3.183841       | -2.54157 | -0.18917 | -0.32103            | 0.010609          |
| 22             | O       | 4.40554        | -2.5655  | -0.06236 | 0.010064            | -0.00545          |
| 23             | O       | 2.464462       | -3.52344 | -0.3518  | 0.005584            | -0.00597          |
| 24             | O       | -4.05257       | 0.232574 | 0.024214 | -0.07451            | 0.002369          |
| 25             | Al      | -3.1915        | 1.642135 | -0.21086 | 0.280964            | 0.006327          |
| 26             | O       | -3.51301       | 3.292376 | -0.39392 | -0.38322            | 0.000765          |
| 27             | H       | -4.37099       | 3.719922 | -0.3286  | 0.372012            | -0.00014          |
